# Supplementary material
Source: Springer Nature journal article supplement (https://www.springermedizin.de/resource/supplementary/12879_2007_623_MOESM1_ESM.pdf/9449368)
Supplement: MOESM1 [file 9449368]

CD4 testing  
n = 1793

CD4 < 200  
n = 617

CD4 ≥ 200  
n = 1176

No TB  
n = 1040

TB  
n = 136

Symptoms  
n = 11

Chest x-ray  
n = 68

Symptoms &  
chest x-ray  
n = 44

Microbiology  
only  
n = 13
